# Supplementary material
Source: Springer Nature journal article supplement (https://www.springermedizin.de/resource/supplementary/12931_2013_1385_MOESM1_ESM.pdf/9426136)

Original RGB

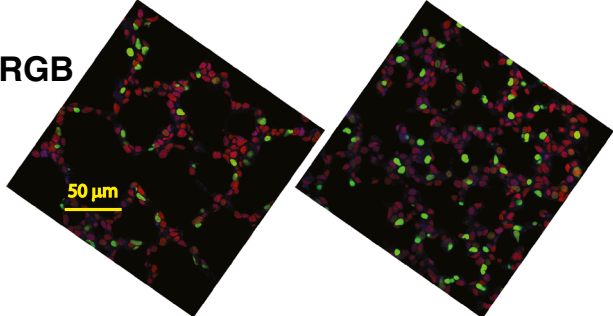

A

B + G  
p27+GFP

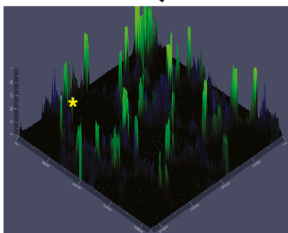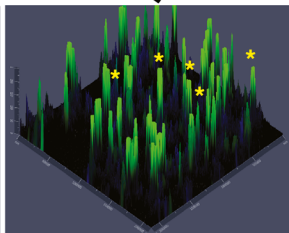

B + R  
p27+PoPo

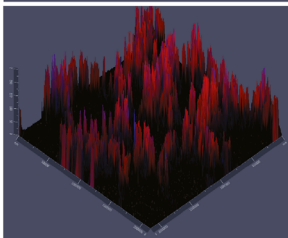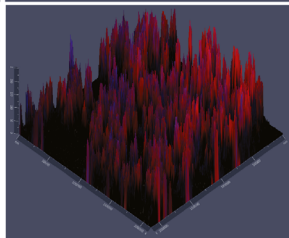

postnatal day 4

12

B

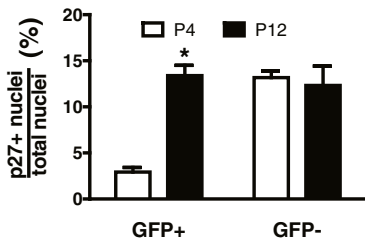

Supplement: MOESM1 [file 9426136]
